# Supplementary material for: Doping Control Using High and Ultra-High Resolution Mass Spectrometry Based Non-Targeted Metabolomics-A Case Study of Salbutamol and Budesonide Abuse
Source: PLoS One. 2013 Sep 18;8(9):e74584. doi: 10.1371/journal.pone.0074584 (PMC3776818; doi:10.1371/journal.pone.0074584)
Supplement: Table S1 — List of compounds as annotated by MassTrix. (DOC) [file pone.0074584.s001.doc]

| V vs CA | | | | | | |
| --- | --- | --- | --- | --- | --- | --- |
| **m/z** | **Form** | **Compound M** | **Group** | **ppm** | **mSigma** | **Tr (min)** |
| FT-ICR & LC-qToF signals | | | | | | |
| 159.0278 | [M+Na]+ | C5H4N4O | CA | 0.28 | > 30 | 1.7 |
| 348.1354 | [M-H]- | C20H19N3O3 | CA | 0.12 | <30 | 10.7 |
| 227.044  228.0473 | [M-H]- | C5H13N2O6P | V | 0.77 | > 30 | 18.4 |
| 281.2486 | [M-H]- | C18H34O2 | CA | 0.11 | <30 | 30.4 |
| 307.0647  308.0682 | [M+Na]+ | C10H12N4O6 | CA | 0.16 | <30 | 6.3 |
| 385.1987  363.21 | [M+Na]+  [M+H]+ | C21H30O5 | CA | 0.17 | > 30 | 13.8 |
| 535.218  536.222 | [M-H]- | C27H36O11 | CA | 0.02 | <30 | 13.6 |
| FT-ICR signals | | | | | | |
| 154.0588 | [M+Na]+ | C4H9N3O2 | V | 0.39 | 30 |  |
| 211.1305 | [M+Na]+ | C10H20O3 | V | 0.07 | > 30 |  |
| 241.0597  243.064 | [M-H]- | C6H15N2O6P | V | 0.8 | > 30 |  |
| 262.091 | [M+Na]+ | C9H13N5O3 | CA | 0.14 | > 30 |  |
|
| 269.1143 | [M-H]- | C12H18N2O5 | CA | 0.05 | >30 |  |
| 275.0751 | [M+Na]+ | C10H12N4O4 | CA | 0.08 | > 30 |  |
|
| 277.1158  278.1192 | [M+Na]+ | C12H18N2O4 | CA | 0.23 | <30 |  |
|
|
| 279.0951 | [M+Na]+ | C11H16N2O5 | CA | 0.44 | > 30 |  |
| 289.1154 | [M-H]- | C10H18N4O6 | CA | 0.04 | >30 |  |
| 296.0929 | [M-H]- | C17H15NO4 | V | 0.55 | >30 |  |
| 310.2013  311.2046  332.1831  -333.1865 | [M+H]+  [M+Na]+ | C17H27NO4 | CA | 0.03 | <30 |  |
| 324.023 | [M-H]- | C11H11N5O3S2 | CA | 0.31 | >30 |  |
| 334.1762 | [M+H]+ | C17H23N3O4 | V | 0 | > 30 |  |
| 340.1885  341.1917 | [M+Na]+ | C19H27NO3 | CA | 0.58 | <30 |  |
|
| 348.1571 (349.1604) | [M+Na]+ | C20H23NO3 | CA | 0.5 | <30 |  |
| 359.0479 | [M+Na]+ | C15H10F6O2 | V | 0.61 | > 30 |  |
| 383.1829 | [M+Na]+ | C21H28O5 | CA | 0.02 | >30 |  |
| 387.2144 | [M+Na]+ | C21H32O5 | CA | 0.12 | > 30 |  |
|
| 399.1279 | [M+Na]+ | C17H20N4O6 | CA | 0.43 | > 30 |  |
| 395.163 | [M-H]- | C10H28N4O12  C8H16N18O2 | CA | <1 | > 30 |  |
| 401.1726 | [M+Na]+ | C24H26O4 | CA | 0.61 | > 30 |  |
| 401.1935  402.1967 | [M+Na]+ | C21H30O6 | CA | 0.16 | <30 |  |
|
|
| 403.1881 | [M+Na]+ | C24H28O4 | CA | 0.22 | > 30 |  |
| 407.138 | [M-H]- | C9H24N6O12 | CA | <1 | > 30 |  |
| 409.344 | [M+Na]+ | C27H46O | CA | 0.22 | 23 |  |
|
|
|
| UHPLC-QTOF signals | | | | | | |
| 128.11 | [M+H]+ | C7H13NO | V | 9.9 | <30 | 10.3 |
| 245.19 | [M+H]+ | C13H12N2O3 | V | 1.5 | <30 | 9.4 |
| 269.08 | [M+H]+ | C10H12N4O5 | CA | 5.2 | <30 | 4.2 |
| 385.31 | [M+H]+ | C26H40O2 | V | 0.7 | <30 | 16.6 |
| 413.21 | [M+H]+ | C23H28N2O5  C24H24N6O | V | <3 | >30 | 15.3 |
| 430.29 | [M+H]+ | C22H35N7O2 | V | 0.8 | <30 | 18.6 |
| 561.35 | [M+H]+ | C33H44N4O4  C32H48O8  C29H40N10O2  C34H40N8 | V | <4 | <30 | 16.6 |
| 17.8 |
|  |
|  |
| 579.36 | [M+H]+ | C29H42N10O3  C32H50O9  C33H46N4O5  C28H46N6O7 | V | <4 | <30 | 16.6 |
| 615.37 | [M+H]+ | C32H54O11  C29H46N10O5  C28H50N6O9  C30H42N14O  C25H42N16O3  C27H54N2O13 | V | <4 | <30 | 16.6 |
| 835.39 | [M+4H]4+ | ~25 formules | V | <5 | >30 | 12.5 |
| S vs CA | | | | | | |
| **m/z** | **Forme** | **Compound M** | **Groupe** | **ppm** | **mSigma** | **Tr (min)** |
| FT-ICR & LC-qToF signals | | | | | | |
| 144.1 | [M+H]+ | C7H13NO3 | S | 4.8 | 5.1 | 1.1 |
|
| 240.1594 | [M+H]+ | C13H21NO3 | S | 0.2 | 10.8 | 4.7 ; 7.4 |
| FT-ICR signals | | | | | | |
| 262.091 | [M+Na]+ | C9H13N5O3 | CA | 0.14 | >30 |  |
|
|
| 320.1161 | [M+H]+ | C13H21NO6S | S | 0.3 | >30 |  |
| 337.9916 |  |  | S |  |  |  |
| 342.0981 | [M+Na]+ | C13H21NO6S | S | 0.1 | 21 |  |
| 353.2181 | [M+H]+ | C17H28N404 | S | 0.2 | >30 |  |
| 358.0721 | [M+K]+ | C13H21NO6S | S | 0.4  0.1 | 7.6  15 |  |
| 402.1305 |  |  | S |  |  |  |
| 433.175 |  |  | S |  |  |  |
| UHPLC-QTOF signals | | | | | | |
| 107.81 |  |  | CA |  |  | 1 |
| 108.08 | [M+H]+ | C7H9N | CA | 7.5 | 3.9 | 1.1 |
| 122.1 | [M+H]+ | C8H11N | CA | 0.4 | 4.9 | 1.5 |
|
|
|
|
|
| 166.05 | [M+H]+ | C8H7NO3 | S | 1.7 | 13.6 | 4.4 |
|
|
|
|
| 213.14 | [M+H]+ | C14H16N2 | CA | 1.2 | 8 | 2.7 |
| 242.02 | [M+H]+ | C6H11NO5S2 | S | 1.6 | 6.5 | 1.3 |
| B vs CA | | | | | | |
| **m/z** | **Forme** | **Formule M** | **Groupe** | **Dppm** | **mSigma** | **Tr (min)** |
| FT-ICR & LC-qToF signals | | | | | | |
| 399.1781 | [M+Na]+ [M+H]+ | C21H28O6 | B | 0.1 | > 30 | 12.8 |
|
|
|
|
| 401.1935 | [M+Na]+ [M+H]+ | C21H30O6 | CA | 0.06 | <30 | 10.3 et 12.5 |
|
|
|
|
|
|
| FT-ICR signals | | | | | | |
| 447.245 | [M+Na]+  [M+H]+ | C22H36N2O6  C20H30N8O4 | CA | 0.13  0.49 | < 30  <30 |  |
| 445.231 | [M+Na]+  [M+H]+ | C22H34N2O6  C20H28N8O4 | CA | 0.2  0.8 | > 30  > 30 |  |
| 383.1830 | [M+Na]+ | C21H28O5 | CA | 0.18 | > 30 |  |
|
|
|
|
|
| 385.1987 | [M+Na]+ | C21H30O5 | CA | 0.37 | > 30 |  |
|
|
|
|
|
|
| 387.2144 | [M+Na]+ | C21H32O5 | CA | 0.07 | >30 |  |
|
|
|
|
|
|
| 389.2299 | [M+Na]+ | C21H34O5 | CA | 0.3 | >30 |  |
|
|
|
|
| 251.1002 | [M+Na]+ | C10H16N2O4 | CA | 0.3 | 10.3 |  |
|
| 262.091 | [M+Na]+ | C9H13N5O3 | CA | 0.13 | >30 |  |
|
|
| UHPLC-QTOF signals | | | | | | |
| 433.2568 | [M+H]+ | C25H36O6  C22H28N10  C21H32N6O4 | - | 3.8  1.2  1.9 | 5.2  15  22 | 16.8 |
| 447.2372 | [M+H]+ | C25H34O7  C26H30N4O3  C22H26N10O  C21H30N6O5 | - | 1.2 | >30 | 14.7 |
| 118.08 | [M+H]+ | C5H11NO2 | CA | 5 | 2.6 | 1 |
|
|
|
|
|
|
|
| 279.13 | [M+H]+ | C19H18O2 | CA | 0.4 | 18.7 | 6 |
